# Supplementary material for: Ensemble-Based Computational Approach Discriminates Functional Activity of p53 Cancer and Rescue Mutants
Source: PubMed Central journal article supplement (PMC3197647; doi:10.1371/journal.pcbi.1002238), 2011-10-20

**Figure S1. Root mean square deviations (RMSD) of  $C_{\alpha}$  atoms of p53 wild-type and mutant systems during simulations**

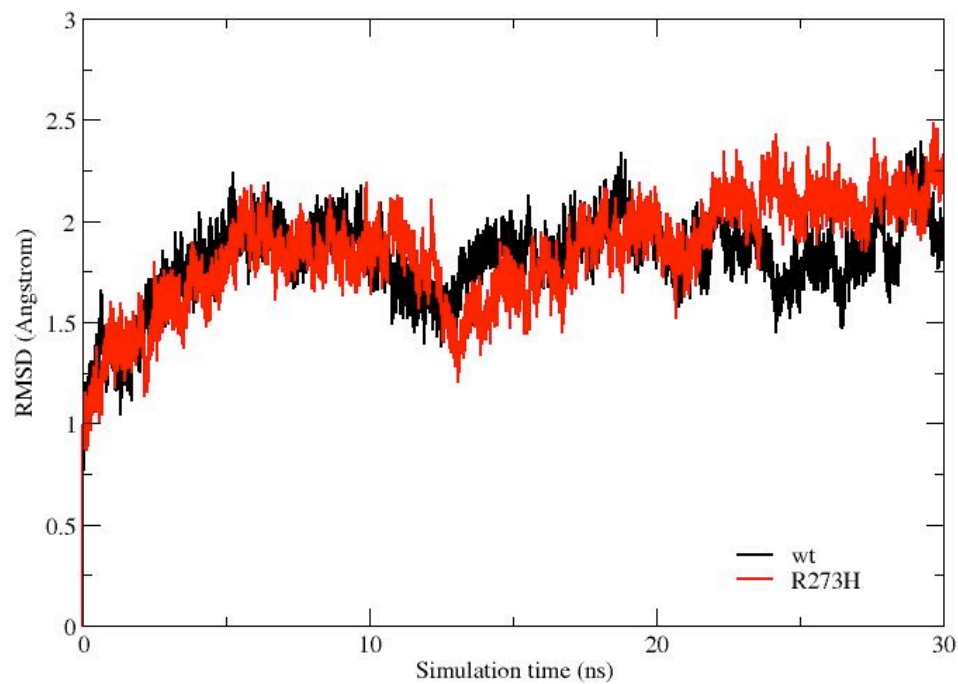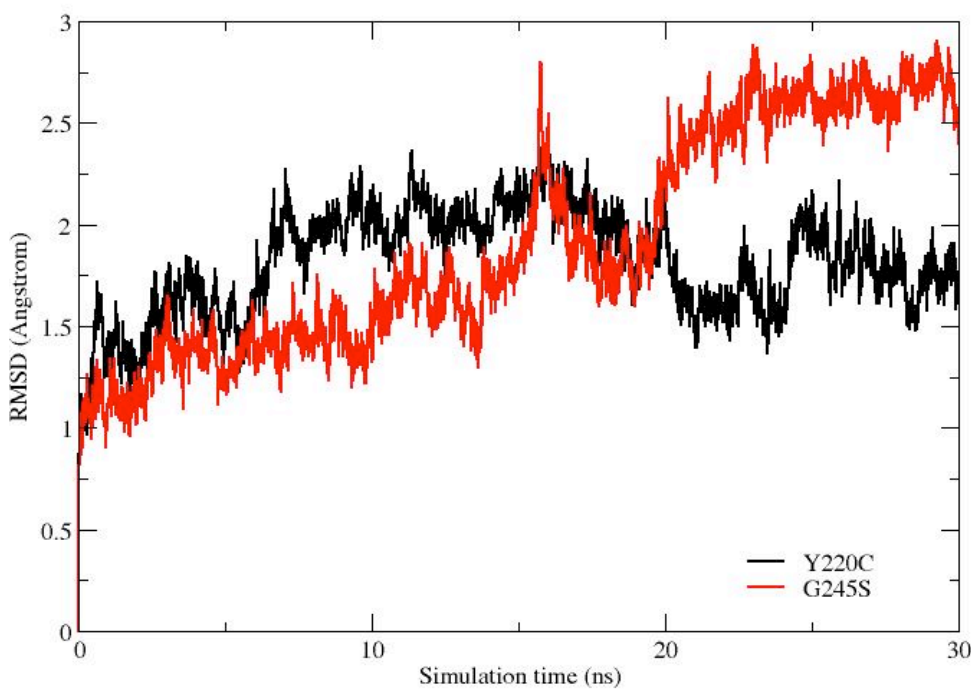

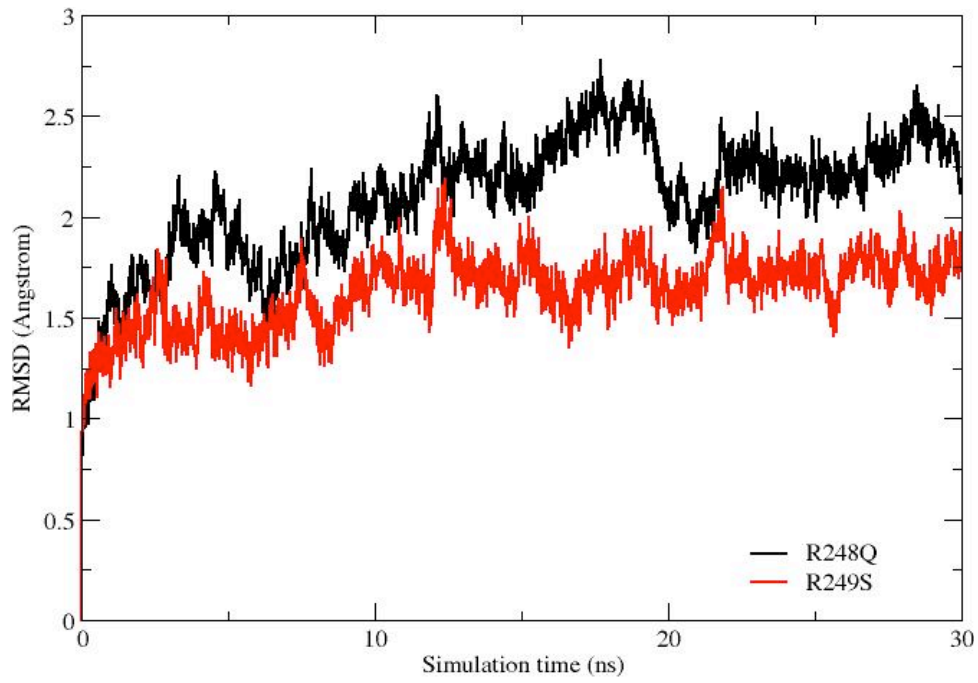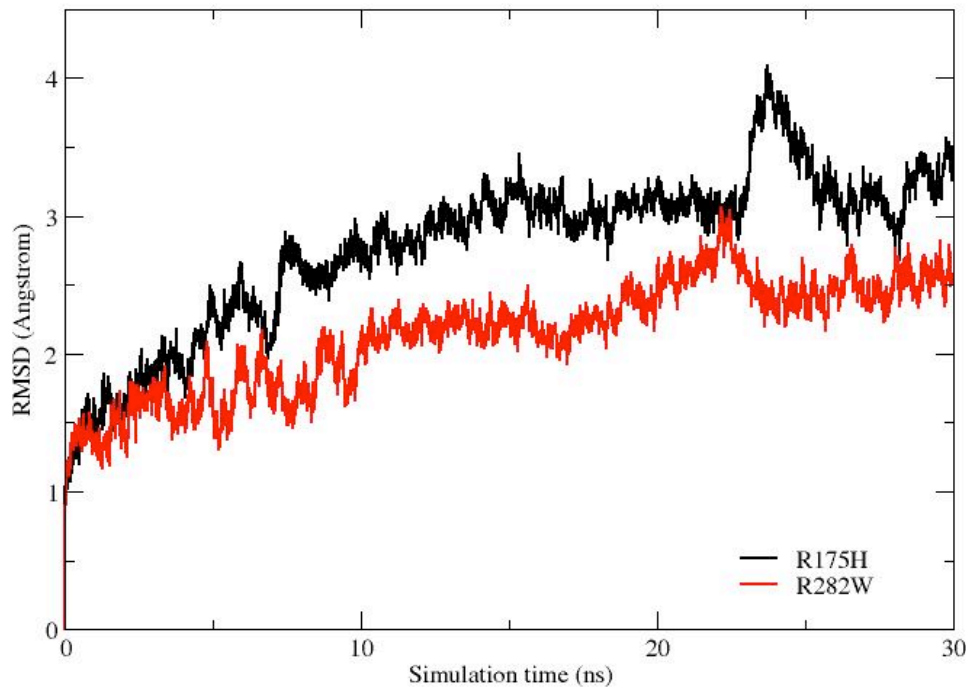

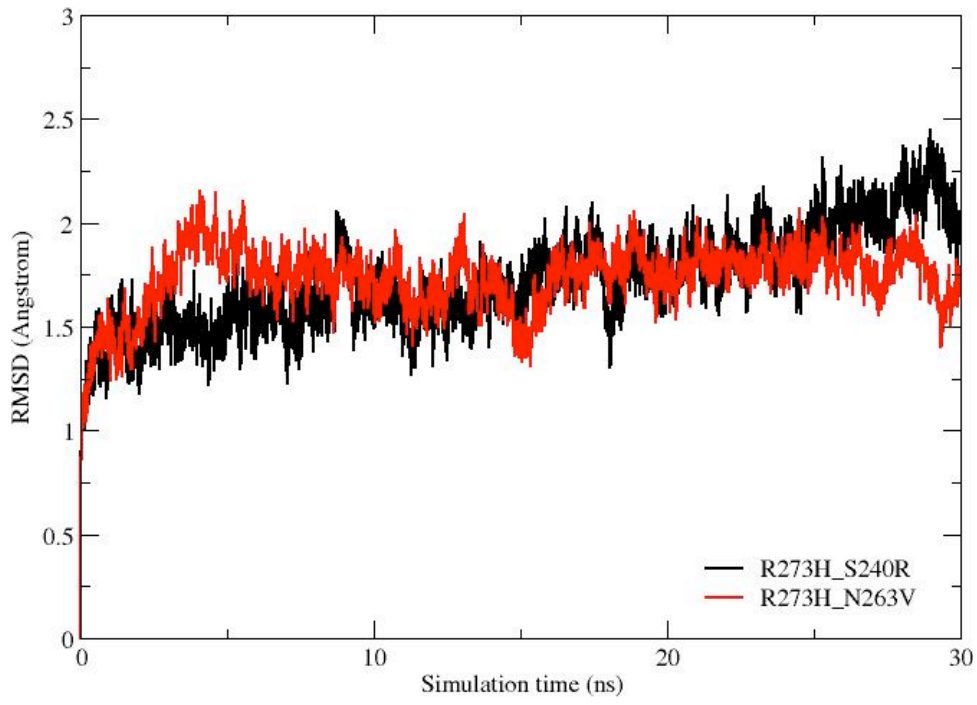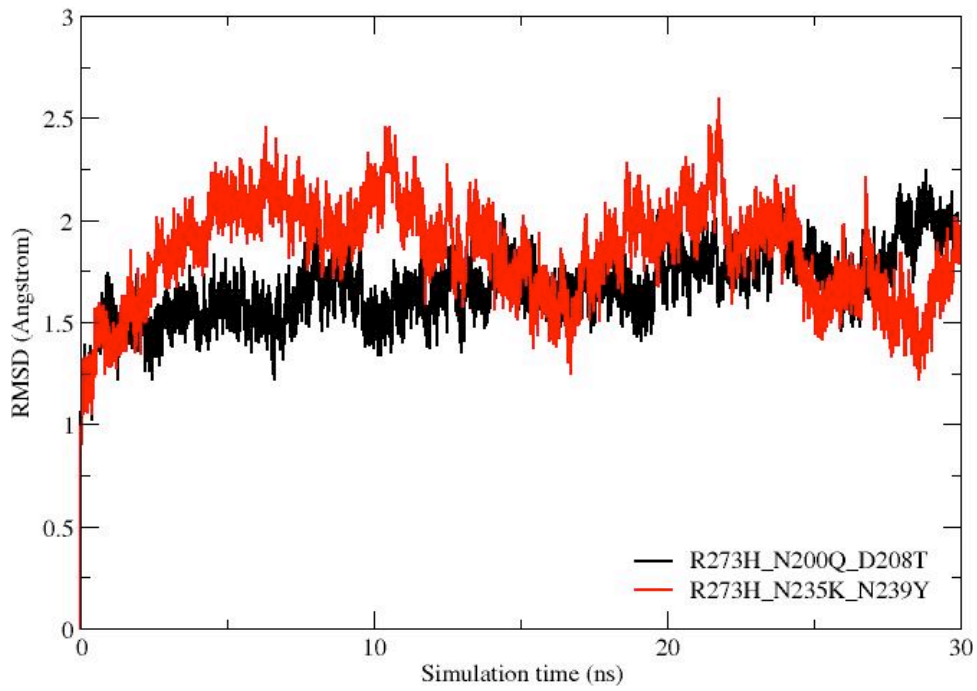

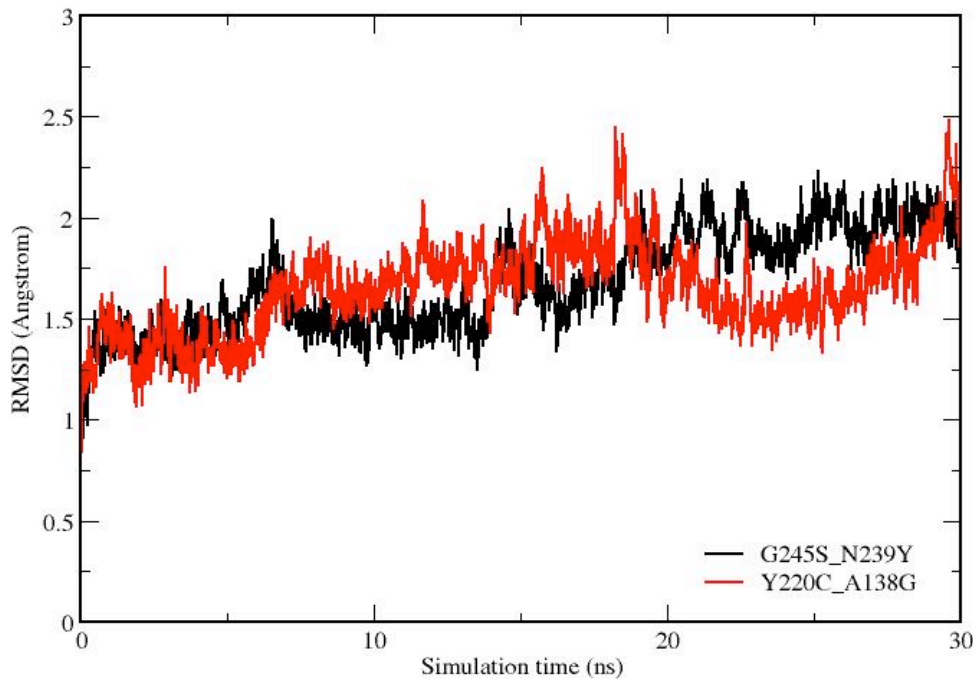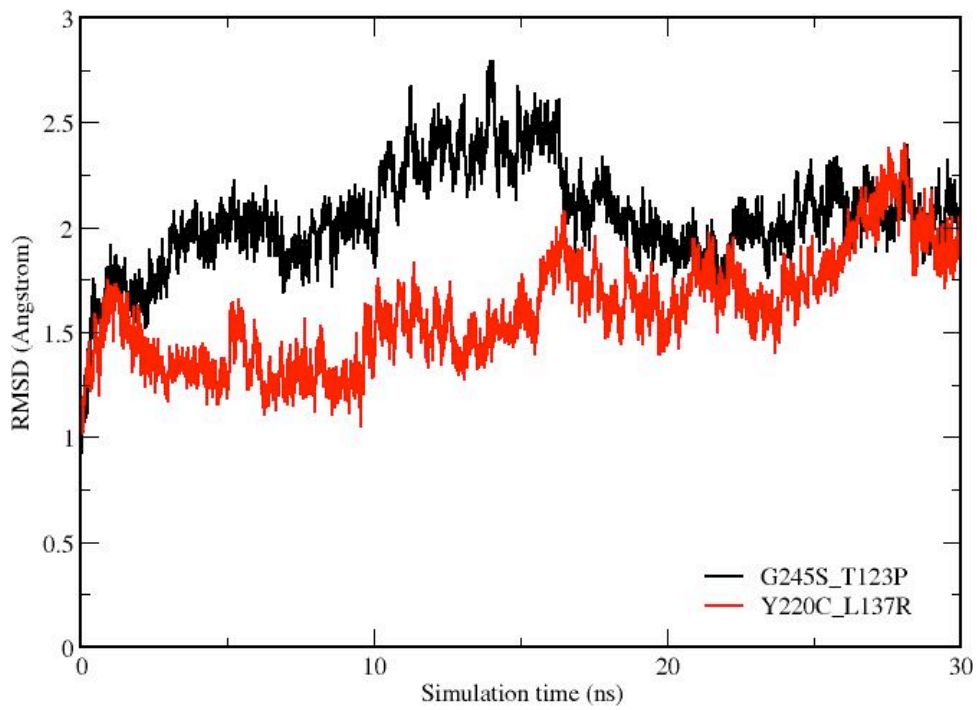

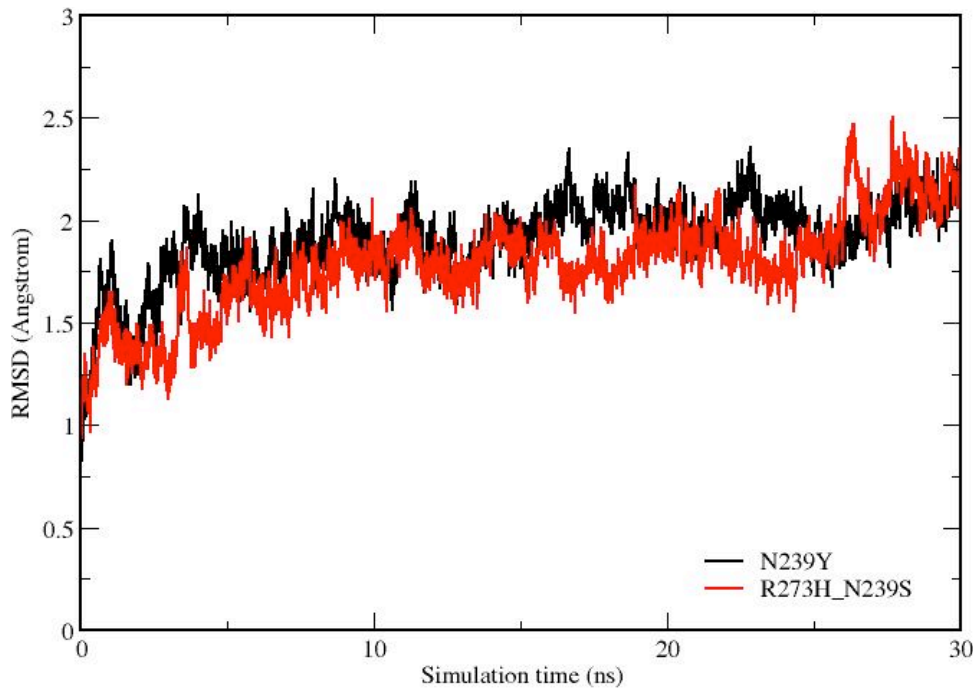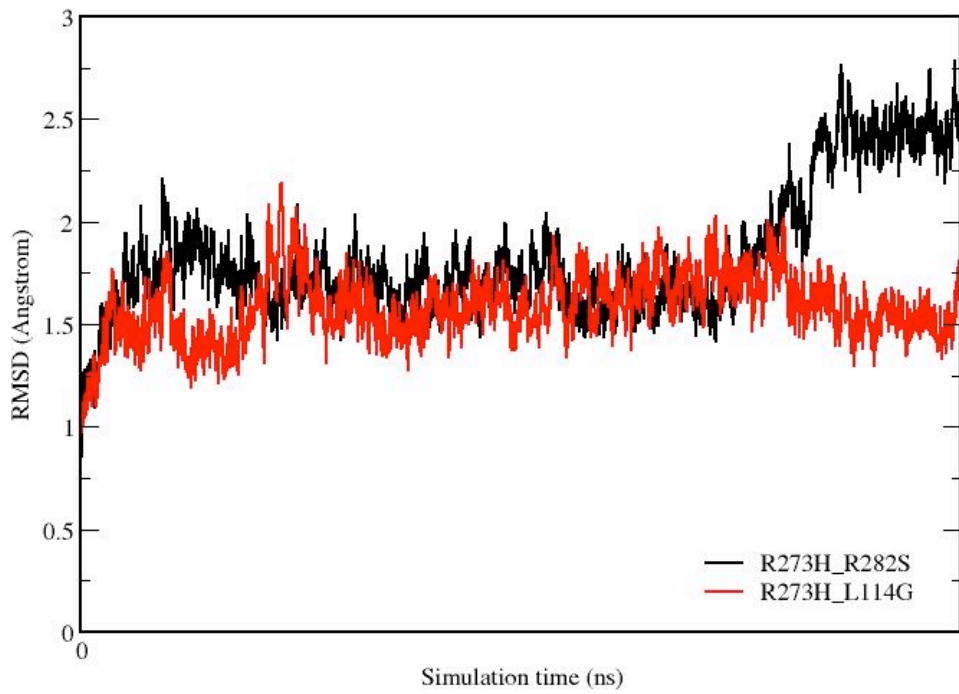

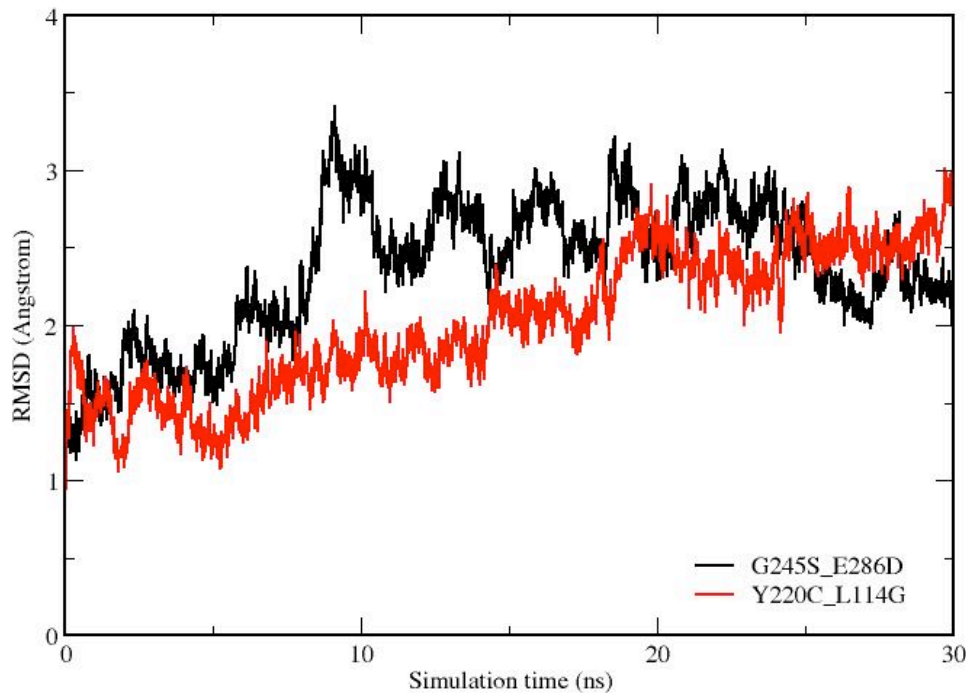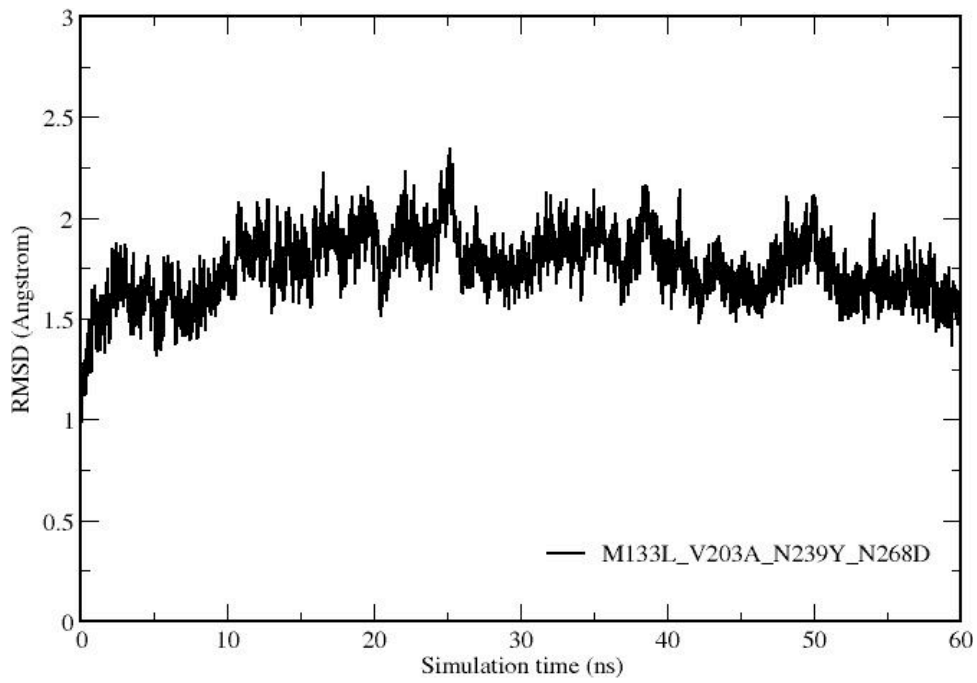

Supplement: pcbi.1002238.s001.pdf [file pcbi.1002238.s001.pdf]
